# Supplementary material for: Post Materialism and Comparative Economic Development: Do Institutions Act as Transmission Channel?
Source: Springer Nature journal article supplement (doi:10.1007/s11205-019-02205-w), 2019-10-15
Supplement: MOESM1 [file 17276556]

**Online Appendix**

**Figure A.1 PM and PM-M**

**Figure A.2 GDP/Cap 2014 and Post Materialism**

**Table A.1 Countries and Post materialism indicators**

| Country | PM | PM-M | Inglehart index |  | Country | PM | PM-M | Inglehart index |
| --- | --- | --- | --- | --- | --- | --- | --- | --- |
| Albania | 0.005061 | -0.47976 | 1.52024 |  | Japan | 0.098058 | -0.19162 | 1.76772 |
| Argentina | 0.242524 | 0.025819 | 1.73674 |  | Latvia | 0.044789 | -0.31783 | 1.68217 |
| Armenia | 0.054536 | -0.39959 | 1.60041 |  | Lithuania | 0.034884 | -0.41226 | 1.58774 |
| Australia | 0.349553 | 0.271102 | 2.2711 |  | Luxembourg | 0.168083 | -0.02927 | 1.97073 |
| Austria | 0.272483 | 0.160891 | 2.16089 |  | Macedonia | 0.044133 | -0.37029 | 1.62971 |
| Azerbaijan | 0.0348 | -0.58188 | 1.41812 |  | Malta | 0.077189 | -0.32596 | 1.67404 |
| Bangladesh | 0.048376 | -0.51226 | 1.48774 |  | Mexico | 0.143012 | -0.09504 | 1.71219 |
| Belarus | 0.057974 | -0.35445 | 1.52977 |  | Moldova | 0.02795 | -0.54141 | 1.45859 |
| Belgium | 0.237089 | 0.02533 | 2.02533 |  | Montenegro | 0.064516 | -0.47005 | 1.52995 |
| Bolivia | 0.177461 | -0.06865 | 1.93264 |  | Netherlands | 0.281718 | 0.171514 | 2.17151 |
| Bosnia | 0.032134 | -0.31363 | 1.68638 |  | New Zealand | 0.242268 | 0.131959 | 2.13196 |
| Brazil | 0.142593 | -0.10556 | 1.89444 |  | Nicaragua | 0.035783 | -0.30174 | 1.72147 |
| Bulgaria | 0.042308 | -0.48654 | 1.51346 |  | Nigeria | 0.059349 | -0.34506 | 1.57385 |
| Canada | 0.227608 | 0.140777 | 2.14078 |  | Norway | 0.1124 | -0.02319 | 1.97681 |
| Chile | 0.162826 | -0.09762 | 1.6373 |  | Pakistan | 0.030014 | -0.397 | 1.603 |
| China | 0.046305 | -0.44557 | 1.68167 |  | Panama | 0.040796 | -0.25373 | 1.76219 |
| Colombia | 0.145646 | -0.10511 | 1.89489 |  | Paraguay | 0.045151 | -0.30435 | 1.70067 |
| Costa Rica | 0.057942 | -0.27972 | 1.73027 |  | Peru | 0.124357 | -0.15866 | 1.84134 |
| Croatia | 0.149784 | -0.14286 | 1.85714 |  | Philippines | 0.076795 | -0.29549 | 1.70451 |
| Czech Republic | 0.102622 | -0.17524 | 1.61072 |  | Poland | 0.07485 | -0.28283 | 1.55139 |
| Denmark | 0.158353 | 0.035242 | 2.03524 |  | Portugal | 0.108448 | -0.2547 | 1.7453 |
| Dominican Republic | 0.167939 | -0.02799 | 1.97201 |  | Romania | 0.045568 | -0.42751 | 1.57249 |
| Ecuador | 0.083333 | -0.24917 | 1.76083 |  | Russia | 0.039984 | -0.45026 | 1.5208 |
| El Salvador | 0.062812 | -0.17847 | 1.8345 |  | Serbia | 0.060533 | -0.4544 | 1.5456 |
| Estonia | 0.049147 | -0.35206 | 1.64794 |  | Slovakia | 0.075832 | -0.30253 | 1.52145 |
| Finland | 0.304025 | 0.193856 | 2.19386 |  | Slovenia | 0.138831 | -0.18344 | 1.9405 |
| France | 0.213552 | -0.02738 | 1.97262 |  | South Africa | 0.066386 | -0.35523 | 1.59007 |
| Georgia | 0.037821 | -0.43117 | 1.56884 |  | South Korea | 0.088605 | -0.20539 | 1.58923 |
| Germany | 0.328149 | 0.216257 | 2.21626 |  | Spain | 0.178775 | -0.1103 | 1.71184 |
| Great Britain | 0.219579 | 0.066789 | 2.06679 |  | Sweden | 0.214358 | 0.112235 | 2.11224 |
| Greece | 0.167286 | -0.02138 | 1.97863 |  | Switzerland | 0.205929 | 0.049881 | 1.9124 |
| Guatemala | 0.090909 | -0.09391 | 1.91608 |  | Taiwan | 0.050477 | -0.42974 | 1.57026 |
| Honduras | 0.009018 | -0.53407 | 1.52204 |  | Turkey | 0.213629 | -0.05102 | 1.87379 |
| Hungary | 0.020186 | -0.57919 | 1.42081 |  | Ukraine | 0.025 | -0.51654 | 1.48346 |
| Iceland | 0.106602 | -0.13253 | 1.86747 |  | United States | 0.242608 | 0.114247 | 2.11425 |
| India | 0.056537 | -0.40478 | 1.7078 |  | Uruguay | 0.268371 | 0.095847 | 2.09585 |
| Ireland | 0.161989 | -0.0547 | 1.9453 |  | Venezuela | 0.123311 | -0.17905 | 1.82095 |
| Italy | 0.263143 | 0.0722 | 2.0722 |  |  |  |  |  |

Indicators calculated with information from the World Values Survey (Wave 3) and European Values Study (Wave 3). For countries that feature in both surveys we take the average of the indicators from both surveys.

**Table A2 Post materialism, institutions and economic development: OLS estimations**

**GDP/Cap 2014 dependent variable**

|  | 1 | 2 | 3 | 4 | 5 |
| --- | --- | --- | --- | --- | --- |
| Estimator | OLS | OLS | OLS | OLS | OLS |
| Inglehart index | 0.95***  (0.31) | 0.67 **  (0.33) | 0.64**  (0.33) | 0.68*  (0.37) | 0.76**  (0.38) |
| Voice and accountability |  | 0.30***  (0.10) |  |  |  |
| Regulatory quality |  |  | 0.45***  (0.10) |  |  |
| Rule of law |  |  |  | 0.35***  (0.10) |  |
| Control of corruption |  |  |  |  | 0.25**  (0.09) |
| Fractionalisation | -0.63**  (0.26) | -0.33  (0.27) | -0.40*  (0.23) | -0.25  (0.26) | -0.35  (0.26) |
| Monarchy | 0.16  (0.20) | -0.06  (0.21) | -0.21  (0.20) | -0.26  (0.22) | -0.29  (0.21) |
| ShareCatholic | -0.39**  (0.16) | -0.43  (0.15)*** | -0.50***  (0.15) | -0.40**  (0.17) | -0.41**  (0.16) |
| ShareMuslim | -0.71***  (0.27) | -0.49*  (0.27) | -0.33  (0.25) | -0.48**  (0.23) | -0.52**  (0.25) |
| Tradeopenness | 1.56***  (0.33) | 1.20**  (0.35) | 1.11***  (0.33) | 1.08***  (0.35) | 1.38***  (0.35) |
| F | 18.11 | 19.36 | 25.62 | 22.71 | 21.93 |
| Adj. R-squared | 0.58 | 0.64 | 0.71 | 0.69 | 0.68 |
| n | 75 | 75 | 75 | 75 | 75 |

* p<0.10; ** p<0.05; *** p<0.01; robust standard errors in parentheses.

**Table A.3 Additional 3SLS estimations: 3rd stage findings**

|  | Dep. variable GDP/Cap 2006 | | | | Dep. variable GDP/Cap 2014; Welzel-Inglehart (2005) as post materialism indicator | | | | Dep. variable GDP/Cap 2014; Welzel-Inglehart (2005) as post materialism indicator | | | |
| --- | --- | --- | --- | --- | --- | --- | --- | --- | --- | --- | --- | --- |
|  | Type of institution | | |  | Type of institution | | |  | Type of institution | | |  |
|  | Voice and Acc. | Regulatory quality | Rule of law | Control of Corruption | Voice and Acc. | Regulatory quality | Rule of law | Control of Corruption | Voice and Acc. | Regulatory quality | Rule of law | Control of Corruption |
| Inglehart index | -1.43**  (0.75) | -1.75**  (0.79) | -0.25  (0.65) | -1.97**  (0.84) | -0.61**  (0.28) | -0.57**  (0.28) | -0.09  (0.23) | -0.38  (0.28) | -0.66**  (0.31) | -0.71**  (0.32) | -0.07  (0.25) | -0.43  (0.32) |
| Institution | 1.35***  (0.17) | 1.50***  (0.18) | 0.93***  (0.12) | 1.01***  (0.13) | 1.36***  (0.18) | 1.37***  (0.20) | 0.82***  (0.13) | 0.80***  (0.14) | 1.56***  (0.20) | 1.65***  (0.22) | 0.95***  (0.15) | 0.94***  (0.16) |
| Goodness of fit Chi2 | 147.00  (0.00) | 164.51  (0.00) | 184.44  (0.00) | 149.77  (0.00) | 105.86  (0.00) | 111.79  (0.00) | 102.67  (0.00) | 81.45  (0.00) | 116.38  (0.00) | 124.95  (0.00) | 115.46  (0.00) | 91.43  (0.00) |
| n | 75 | 75 | 75 | 75 | 51 | 51 | 51 | 51 | 51 | 51 | 51 | 51 |
|  | No former communist countries; GDP/Cap 2014 | | | | No former communist countries; GDP/Cap 2006 | | | | Instrument: Rainfall variation; GDP/Cap 2014 | | | |
|  | Type of institution | | |  | Type of institution | | |  | Type of institution | | |  |
|  | Voice and Acc. | Regulatory quality | Rule of law | Control of Corruption | Voice and Acc. | Regulatory quality | Rule of law | Control of Corruption | Voice and Acc. | Regulatory quality | Rule of law | Control of Corruption |
| Inglehart index | -1.68**  (0.82) | -2.92***  (0.81) | -0.37  (0.64) | -2.14**  (0.85) | -1.34  (0.89) | -2.82***  (0.93) | 0.03***  (0.71) | -1.93**  (0.96) | -1.50*  (0.88) | -3.93***  (1.05) | -0.18  (0.68) | -0.51  (0.80) |
| Institution | 1.28***  (0.18) | 1.66***  (0.19) | 0.79***  (0.11) | 0.88***  (0.13) | 1.36***  (0.19) | 1.80***  (0.22) | 0.84***  (0.13) | 0.95***  (0.14) | 1.25***  (0.18) | 1.81***  (0.22) | 0.85***  (0.11) | 0.80***  (0.12) |
| Goodness of fit Chi2 | 115.00  (0.00) | 153.49  (0.00) | 158.22  (0.00) | 124.00  (0.000 | 130.88  (0.00) | 158.32  (0.00) | 172.23  (0.00) | 133.86  (0.00) | 142.40  (0.00) | 131.91  (0.00) | 206.39  (0.00) | 168.81  (0.00) |
| n | 56 | 56 | 56 | 56 | 56 | 56 | 56 | 56 | 69 | 69 | 69 | 69 |
|  | Instrument: Rainfall variation; GDP/Cap 2006 | | | | Instrument: Genetic distance to Australia; GDP/Cap 2014 | | | | Instrument: Genetic distance to Australia; GDP/Cap 2006 | | | |
|  | Type of institution | | |  | Type of institution | | |  | Type of institution | | |  |
|  | Voice and Acc. | Regulatory quality | Rule of law | Control of Corruption | Voice and Acc. | Regulatory quality | Rule of law | Control of Corruption | Voice and Acc. | Regulatory quality | Rule of law | Control of Corruption |
| Inglehart index | -1.24  (0.94) | -4.16***  (1.17) | 0.23  (0.72) | -0.22  (0.87) | -1.31**  (0.56) | -2.84***  (0.69) | -1.32**  (0.56) | -3.03***  (0.73) | -2.72***  (0.75) | -2.91***  (0.76) | -1.00*  (0.60) | -2.90***  (0.79) |
| Institution | 1.32***  (0.19) | 1.99***  (0.25) | 0.88***  (0.12) | 0.86***  (0.13) | 0.96***  (0.10) | 1.56***  (0.15) | 0.96***  (0.10) | 1.05***  (0.11) | 1.56***  (0.15) | 1.73***  (0.17) | 1.02***  (0.10) | 1.13***  (0.12) |
| Goodness of fit Chi2 | 157.72  (0.00) | 135.40  (0.00) | 228.48  (0.00) | 183.56  (0.00) | 141.11  (0.00) | 141.06  (0.00) | 141.11  (0.00) | 123.85  (0.00) | 138.11  (0.00) | 151.31  (0.00) | 154.86  (0.00) | 130.55  (0.00) |
| N | 69 | 69 | 69 | 69 | 65 | 65 | 65 | 65 | 65 | 65 | 65 | 65 |

* p<0.10; ** p<0.05; *** p<0.01; robust standard errors in parentheses. Post materialism is instrument with the pronoun drop rule unless indicated otherwise.

**Table A.4 Direct and total effects from post materialism: additional estimates**

| Dependent variable 3rd stage | GDP/Cap 2014 | | GDP/Cap 2006 | | GDP/Cap 2014 | | GDP/Cap 2006 | |
| --- | --- | --- | --- | --- | --- | --- | --- | --- |
|  | Welzel-Inglehart (2005) as post materialism indicator | | Welzel-Inglehart (2005) as post materialism indicator | | No former communist countries | | No former communist countries | |
| Type of institution | Direct effect Inglehart index  ( | Total effect Inglehart index | Direct effect Inglehart index  ( | Total effect Inglehart index | Direct effect Inglehart index  ( | Total effect Inglehart index | Direct effect Inglehart index  ( | Total effect Inglehart index |
| Voice and accountability | -0.61**  (0.28) | 1.30***  (0.18) | -0.61**  (0.28) | 1.51***  (0.20) | -1.68**  (0.82) | 2.72***  (0.34) | -1.34  (0.89) | 3.13***  (0.37) |
| Regulatory quality | -0.57**  (0.28) | 1.29***  (0.18) | -0.57**  (0.28) | 1.53***  (0.20) | -2.92***  (0.81) | 2.46***  (0.28) | -2.82***  (0.93) | 2.96***  (0.33) |
| Rule of law | -0.09  (0.23) | 1.32***  (0.17) | -0.09  (0.23) | 1.55***  (0.19) | -0.37  (0.64) | 2.33***  (0.29) | 0.03  (0.71) | 2.75***  (0.32) |
| Control of corruption | -0.38  (0.28) | 1.35***  (0.18) | -0.38  (0.28) | 1.58***  (0.20) | -2.14**  (0.85) | 2.06***  (0.29) | -1.93**  (0.96) | 2.46***  (0.33) |
|  |  |  |  |  |  |  |  |  |
| Dependent variable 3rd stage | GDP/Cap 2014 | | GDP/Cap 2006 | | GDP/Cap 2014 | | GDP/Cap 2006 | |
|  | Instrument: Rainfall variation | | Instrument: Rainfall variation | | Instrument: Genetic distance to Australia | | Instrument: Genetic distance to Australia | |
| Type of institution | Direct effect Inglehart index  ( | Total effect Inglehart index | Direct effect Inglehart index  ( | Total effect Inglehart index | Direct effect Inglehart index  ( | Total effect Inglehart index | Direct effect Inglehart index  ( | Total effect Inglehart index |
| Voice and accountability | -1.50*  (0.88) | 3.43***  (0.35) | -1.24  (0.94) | 3.76***  (0.38) | -1.31**  (0.56) | 2.50***  (0.38) | -2.72***  (0.75) | 2.85***  (0.40) |
| Regulatory quality | -3.93***  (1.05) | 3.33***  (0.34) | -4.16***  (1.17) | 3.78***  (0.38) | -2.84***  (0.69) | 2.32***  (0.35) | -2.91***  (0.76) | 2.80***  (0.39) |
| Rule of law | -0.18  (0.68) | 3.18***  (0.31) | 0.23  (0.72) | 3.51***  (0.35) | -1.32**  (0.56) | 2.37***  (0.35) | -1.00*  (0.60) | 2.77***  (0.37) |
| Control of corruption | -0.51  (0.80) | 3.47***  (0.35) | -0.22  (0.87) | 3.84***  (0.38) | -3.03***  (0.73)a | 2.35***  (0.38) | -2.90***  (0.79) | 2.75***  (0.41) |

* p<0.10; ** p<0.05; *** p<0.01; robust standard errors in parentheses. Post materialism is instrumented with the pronoun-drop rule variable unless indicated otherwise.
